# Supplementary material for: A community-based intervention to improve screening, referral and follow-up of non-communicable diseases and anaemia amongst pregnant and postpartum women in rural India: study protocol for a cluster randomised trial
Source: PubMed Central journal article supplement (PMC10410790; doi:10.1186/s13063-023-07510-x), 2023-08-09
Supplement: 13063_2023_7510_MOESM1_ESM.pdf [file 13063_2023_7510_MOESM1_ESM.pdf]

### **Informed consent materials**

- 1. ASHA workers**
- 2. Women**
- 3. PHC**

**PARTICIPANT CONSENT FORM**  
 SMARThealth Pregnancy 2

Ethics Reference:

**Purpose of Study:** The purpose of this study is to decrease anaemia and improve detection and follow-up of women with diabetes and hypertension during pregnancy and in the first 12 months after delivery.

*Please  
 initial  
 each  
 box*

- |    |                                                                                                                                                                                                                                                                                                 |                                                         |
|----|-------------------------------------------------------------------------------------------------------------------------------------------------------------------------------------------------------------------------------------------------------------------------------------------------|---------------------------------------------------------|
| 1  | I confirm that I have read and understand the information sheet version _____ dated _____ for the above study. I have had the opportunity to consider the information, ask questions and have had these answered satisfactorily.                                                                | <input style="width: 60px; height: 25px;" type="text"/> |
| 2  | I understand that my participation is voluntary and that I am free to withdraw at any time, without giving any reason, and without any adverse consequences or penalty.                                                                                                                         | <input style="width: 60px; height: 25px;" type="text"/> |
| 3  | I understand that research data collected during the study may be looked at by designated individuals from the University of Oxford and The George Institute for Global Health where it is relevant to my taking part in this study. I give permission for these individuals to access my data. | <input style="width: 60px; height: 25px;" type="text"/> |
| 4  | I understand that the information I give to the study may be used for other research studies in a way that I cannot be identified                                                                                                                                                               | <input style="width: 60px; height: 25px;" type="text"/> |
| 5  | I understand that this project has been reviewed by, and received ethics clearance through, the University of Oxford Tropical Research Ethics Committee (OxTREC) and The George Institute Ethics Committee, India.                                                                              | <input style="width: 60px; height: 25px;" type="text"/> |
| 6  | I understand who will have access to personal data provided, how the data will be stored and what will happen to the data at the end of the project.                                                                                                                                            | <input style="width: 60px; height: 25px;" type="text"/> |
| 7  | I understand how this research will be written up and published.                                                                                                                                                                                                                                | <input style="width: 60px; height: 25px;" type="text"/> |
| 8  | I understand how to raise a concern or make a complaint.                                                                                                                                                                                                                                        | <input style="width: 60px; height: 25px;" type="text"/> |
| 9  | I agree to be contacted by the study team by phone call, or through my ASHA worker, for follow-up during the study                                                                                                                                                                              | <input style="width: 60px; height: 25px;" type="text"/> |
| 11 | I agree to take part in the study                                                                                                                                                                                                                                                               | <input style="width: 60px; height: 25px;" type="text"/> |

|                               |      |           |
|-------------------------------|------|-----------|
| Name of Participant           | Date | Signature |
| Name of Witness               | Date | Signature |
| Name of person taking consent | Date | Signature |

**PARTICIPANT CONSENT FORM**  
**SMARThealth Pregnancy 2:**  
**Ethics Reference:**

**Purpose of Study:** The purpose of this study is to decrease anaemia prevalence and improve detection and follow-up of women with diabetes and hypertension detected in pregnancy and in the first 12 months after delivery.

---

S  
No

*Person taking consent to  
initial each box with  
permission of participant*

- 1 I confirm that I have read and understand the information sheet version \_\_\_\_\_ dated \_\_\_\_\_ for the above study. I have had the opportunity to consider the information, ask questions and have had these answered satisfactorily.
- 2 I understand that the participation of the Primary Health Centre (PHC) is voluntary and that the PHC is not obliged to enrol into the study.
- 3 I understand that research data collected during the study may be looked at by designated individuals from the University of Oxford and The George Institute for Global Health where it is relevant to my taking part in this study. I give permission for these individuals to access data necessarily for this study from my health centre.
- 4 I understand that this project has been reviewed by, and received ethics clearance through, the University of Oxford Tropical Research Ethics Committee (OxTREC) and The George Institute Ethics Committee, India.
- 5 I understand who will have access to personal data provided, how the data will be stored and what will happen to the data at the end of the project.
- 6 I understand how this research will be written up and published.
- 7 I understand how to raise a concern or make a complaint.
- 8 I agree for the PHC, its associated staff, and willing patient participants to take part in the study

|                               |       |           |
|-------------------------------|-------|-----------|
| _____                         | _____ | _____     |
| Name of Administrative head   | Date  | Signature |
| _____                         | _____ | _____     |
| Name of witness               | Date  | Signature |
| _____                         | _____ | _____     |
| Name of person taking consent | Date  | Signature |

**PARTICIPANT CONSENT FORM**  
**SMARThealth Pregnancy 2:**

**Ethics Reference:**

**Purpose of Study:** The purpose of this study is to decrease anaemia prevalence and improve detection and follow-up of women with diabetes and hypertension detected in pregnancy in the first 12 months after delivery.

S  
No

*Please initial  
each box*

|    |                                                                                                                                                                                                                                                                                                 |                          |
|----|-------------------------------------------------------------------------------------------------------------------------------------------------------------------------------------------------------------------------------------------------------------------------------------------------|--------------------------|
| 1  | I confirm that I have read and understand the information sheet version _____ dated _____ for the above study. I have had the opportunity to consider the information, ask questions and have had these answered satisfactorily.                                                                | <input type="checkbox"/> |
| 2  | I understand that my participation is voluntary and that I am free to withdraw at any time, without giving any reason, and without any adverse consequences or penalty.                                                                                                                         | <input type="checkbox"/> |
| 3  | I understand that research data collected during the study may be looked at by designated individuals from the University of Oxford and The George Institute for Global Health where it is relevant to my taking part in this study. I give permission for these individuals to access my data. | <input type="checkbox"/> |
| 4  | I understand that the information I give to the study may be used for other research studies in a way that I cannot be identified.                                                                                                                                                              | <input type="checkbox"/> |
| 5  | I understand that this project has been reviewed by, and received ethics clearance through, the University of Oxford Tropical Research Ethics Committee (OxTREC) and The George Institute Ethics Committee, India.                                                                              | <input type="checkbox"/> |
| 6  | I understand who will have access to personal data provided, how the data will be stored and what will happen to the data at the end of the project.                                                                                                                                            | <input type="checkbox"/> |
| 7  | I understand how this research will be written up and published.                                                                                                                                                                                                                                | <input type="checkbox"/> |
| 8  | I understand how to raise a concern or make a complaint.                                                                                                                                                                                                                                        | <input type="checkbox"/> |
| 9  | I agree to be contacted by the study team by phone call for follow-up during the study                                                                                                                                                                                                          | <input type="checkbox"/> |
| 10 | I agree to take part in the study                                                                                                                                                                                                                                                               | <input type="checkbox"/> |

|                               |      |           |
|-------------------------------|------|-----------|
| Name of Participant           | Date | Signature |
| Name of Witness               | Date | Signature |
| Name of person taking consent | Date | Signature |
